# Supplementary material for: Golgi membrane protein Erd1 Is essential for recycling a subset of Golgi glycosyltransferases
Source: eLife. 2021 Nov 25;10:e70774. doi: 10.7554/eLife.70774 (PMC8616560; doi:10.7554/eLife.70774)
Supplement: Supplementary file 1. [file elife-70774-supp1.xlsx]

## Sheet: Table S1-strains
Table S1: Strains used in this study
Strain	Genotype
SEY6210	MAT alpha leu2-3,112 ura3-52 his3-∆200 trp1-∆901 suc2-∆9 lys2-801 GAL+
yRS492	MAT alpha erd1∆ leu2-3,112 ura3-52 his3-∆200 trp1-∆901 suc2-∆9 lys2-801 GAL+
yRS684	MAT alpha Erd1-mNeonGreen-3xHA::TRP1 Mnn9-mCherry::HIS3 leu2-3,112 ura3-52 his3-∆200 trp1-∆901 suc2-∆9 lys2-801 GAL+
yRS732	MAT a Erd1-mNeonGreen-HA::KanMX Gea2-3xMars::TRP1 suc2-∆9 ura3-52 his3-∆200 leu2-3,112 lys2-801 trp1-∆901
yRS686	MAT alpha Erd1-mNeonGreen-3xHA::TRP1 Sec7-6xDsRed::URA3 leu2-3,112 ura3-52 his3-∆200 trp1-∆901 suc2-∆9 lys2-801 GAL+
yRS525	MAT alpha Och1-GFP::HIS3 leu2-3,112 ura3-52 trp1-∆901 suc2-∆9 lys2-801 GAL+
yRS647	MAT alpha Och1-GFP::TRP1 erd1∆ leu2-3,112 ura3-52 his3-∆200 trp1-∆901 suc2-∆9 lys2-801 GAL+
yRS629	MAT alpha Kre2-GFP-TRP1 leu2-3,112 ura3-52 his3-∆200 trp1-∆901 suc2-∆9 lys2-801 GAL+
yRS692	MAT alpha Kre2-GFP::TRP1 erd1∆ leu2-3,112 ura3-52 his3-∆200 trp1-∆901 suc2-∆9 lys2-801 GAL+
yRS418	MAT alpha Erd2-GFP::TRP1 leu2-3,112 ura3-52 his3-∆200 trp1-∆901 suc2-∆9 lys2-801 GAL+
yRS662	MAT alpha Erd2-GFP::TRP1 erd1∆ leu2-3,112 ura3-52 his3-∆200 trp1-∆901 suc2-∆9 lys2-801 GAL+
yRS640	MAT alpha Aur1-GFP::TRP1 leu2-3,112 ura3-52 his3-∆200 trp1-∆901 suc2-∆9 lys2-801 GAL+
yRS695	MAT alpha Aur1-GFP::TRP1 erd1∆ leu2-3,112 ura3-52 his3-∆200 trp1-∆901 suc2-∆9 lys2-801 GAL+
yRS552	MAT alpha vps74∆ leu2-3,112 ura3-52 his3-∆200 trp1-∆901 suc2-∆9 lys2-801 GAL+
yRS678	MAT alpha vps74∆ erd1∆ leu2-3,112 ura3-52 his3-∆200 trp1-∆901 suc2-∆9 lys2-801 GAL+
yRS589	MAT alpha Och1-GFP-TRP1 vps74∆ leu2-3,112 ura3-52 his3-∆200 trp1-∆901 suc2-∆9 lys2-801 GAL+
yRS631	MAT alpha Kre2-GFP-TRP1 vps74∆ leu2-3,112 ura3-52 his3-∆200 trp1-∆901 suc2-∆9 lys2-801 GAL+
yRS586	MAT alpha Mnn1-GFP-TRP1 leu2-3,112 ura3-52 his3-∆200 trp1-∆901 suc2-∆9 lys2-801 GAL+
yRS610	MAT alpha Mnn1-GFP-TRP1 vps74∆ leu2-3,112 ura3-52 his3-∆200 trp1-∆901 suc2-∆9 lys2-801 GAL+
yRS651	MAT alpha Mnn1-GFP::TRP1 erd1∆ leu2-3,112 ura3-52 his3-∆200 trp1-∆901 suc2-∆9 lys2-801 GAL+
yRS533	MAT alpha Mnn2-GFP::HIS3 leu2-3,112 ura3-52 trp1-∆901 suc2-∆9 lys2-801 GAL+
yRS617	MAT alpha Mnn2-GFP-TRP1 vps74∆ leu2-3,112 ura3-52 his3-∆200 trp1-∆901 suc2-∆9 lys2-801 GAL+
yRS648	MAT alpha Mnn2-GFP::TRP1 erd1∆ leu2-3,112 ura3-52 his3-∆200 trp1-∆901 suc2-∆9 lys2-801 GAL+
yRS587	MAT alpha Mnn5-GFP-TRP1 leu2-3,112 ura3-52 his3-∆200 trp1-∆901 suc2-∆9 lys2-801 GAL+
yRS588	MAT alpha Mnn5-GFP-TRP1 vps74∆ leu2-3,112 ura3-52 his3-∆200 trp1-∆901 suc2-∆9 lys2-801 GAL+
yRS650	MAT alpha Mnn5-GFP::TRP1 erd1∆ leu2-3,112 ura3-52 his3-∆200 trp1-∆901 suc2-∆9 lys2-801 GAL+
yRS528	MAT alpha Anp1-GFP::HIS3 leu2-3,112 ura3-52 trp1-∆901 suc2-∆9 lys2-801 GAL+
yRS612	MAT alpha Anp1-GFP-TRP1 vps74∆ leu2-3,112 ura3-52 his3-∆200 trp1-∆901 suc2-∆9 lys2-801 GAL+
yRS693	MAT alpha Anp1-GFP::TRP1 erd1∆ leu2-3,112 ura3-52 his3-∆200 trp1-∆901 suc2-∆9 lys2-801 GAL+
yRS567	MAT alpha Hoc1-GFP-TRP1 leu2-3,112 ura3-52 his3-∆200 trp1-∆901 suc2-∆9 lys2-801 GAL+
yRS590	MAT alpha Hoc1-GFP-TRP1 vps74∆ leu2-3,112 ura3-52 his3-∆200 trp1-∆901 suc2-∆9 lys2-801 GAL+
yRS649	MAT alpha Hoc1-GFP::TRP1 erd1∆ leu2-3,112 ura3-52 his3-∆200 trp1-∆901 suc2-∆9 lys2-801 GAL+
yRS656	MAT alpha Ktr3-GFP::TRP1 leu2-3,112 ura3-52 his3-∆200 trp1-∆901 suc2-∆9 lys2-801 GAL+
yRS657	MAT alpha Ktr3-GFP::TRP1 vps74∆ leu2-3,112 ura3-52 his3-∆200 trp1-∆901 suc2-∆9 lys2-801 GAL+
yRS694	MAT alpha Ktr3-GFP::TRP1 erd1∆ leu2-3,112 ura3-52 his3-∆200 trp1-∆901 suc2-∆9 lys2-801 GAL+
yRS641	MAT alpha Aur1-GFP::TRP1 vps74∆ leu2-3,112 ura3-52 his3-∆200 trp1-∆901 suc2-∆9 lys2-801 GAL+
CFY4262	MAT a vps74∆::KanMX leu2::mNeonGreen-VPS74::LEU2 GEA2-3xmars::TRP1 suc2-∆9 ura3-52 his3-∆200 leu2-3,112 lys2-801 trp1-∆901
yRS770	MAT a erd1∆ vps74∆::KanMX leu2::mNeonGreen-VPS74::LEU2 SEC7-6xdsRed::URA3 suc2-∆9 ura3-52 his3-∆200 leu2-3,112 lys2-801 trp1-∆901
yRS674	MAT alpha Erd1-mNeonGreen-3xHA::TRP1 leu2-3,112 ura3-52 his3-∆200 trp1-∆901 suc2-∆9 lys2-801 GAL+
yRS749	MAT alpha Erd1-mNeonGreen-3xHA::TRP1 vps74∆ leu2-3,112 ura3-52 his3-∆200 trp1-∆901 suc2-∆9 lys2-801 GAL+
yRS502	MAT alpha sec21-1 leu2-3,112 ura3-52 his3-∆200 trp1-∆901 suc2-∆9 lys2-801 GAL+
yRS607	MAT alpha erd1∆ sec21-1 leu2-3,112 ura3-52 his3-∆200 trp1-∆901 suc2-∆9 lys2-801 GAL+
yRS599	MAT alpha mnn9∆ leu2-3,112 ura3-52 his3-∆200 trp1-∆901 suc2-∆9 lys2-801 GAL+
yRS558	MAT alpha och1∆ leu2-3,112 ura3-52 his3-∆200 trp1-∆901 suc2-∆9 lys2-801 GAL+
yRS683	MAT alpha ktr3∆ leu2-3,112 ura3-52 his3-∆200 trp1-∆901 suc2-∆9 lys2-801 GAL+
yRS682	MAT alpha kre2∆ leu2-3,112 ura3-52 his3-∆200 trp1-∆901 suc2-∆9 lys2-801 GAL+
yRS772	MAT alpha kre2∆ ktr3∆ leu2-3,112 ura3-52 his3-∆200 trp1-∆901 suc2-∆9 lys2-801 GAL+
yRS755	MAT alpha leu2::mNeonGreen-VPS74::LEU2 Mnn9-mCherry-HIS3 leu2-3,112 ura3-52 trp1-∆901 suc2-∆9 lys2-801 GAL+
CFY4261	MAT a vps74∆::KanMX leu2::mNeonGreen-VPS74::LEU2 SEC7-6xdsRed::URA3 suc2-∆9 ura3-52 his3-∆200 leu2-3,112 lys2-801 trp1-∆901
yRS717	MAT alpha HTF(6x His-TEV-3xFLAG)-Vps74::leu2::LEU2 leu2-3,112 ura3-52 his3-∆200 trp1-∆901 suc2-∆9 lys2-801 GAL+
yRS718	MAT alpha Erd1-GFP-TRP1 HTF-Vps74::leu2::LEU2 leu2-3,112 ura3-52 his3-∆200 trp1-∆901 suc2-∆9 lys2-801 GAL+
yRS690	MAT alpha Och1-HTF::NAT leu2-3,112 ura3-52 his3-∆200 trp1-∆901 suc2-∆9 lys2-801 GAL+
yRS724	MAT alpha Och1-HTF::NAT GFP-Vps74::leu2::LEU2 leu2-3,112 ura3-52 his3-∆200 trp1-∆901 suc2-∆9 lys2-801 GAL+
yRS668	MAT alpha Erd1-GFP::TRP1 Och1-HTF::NatMX leu2-3,112 ura3-52 his3-∆200 trp1-∆901 suc2-∆9 lys2-801 GAL+
yRS729	MAT alpha Och1-HTF::NATMX GFP-Vps74::leu2::LEU2 erd1∆ leu2-3,112 ura3-52 his3-∆200 trp1-∆901 suc2-∆9 lys2-801 GAL+
yRS691	MAT alpha Kre2-HTF::NAT leu2-3,112 ura3-52 his3-∆200 trp1-∆901 suc2-∆9 lys2-801 GAL+
yRS725	MAT alpha Kre2-HTF::NAT GFP-Vps74::leu2::LEU2 leu2-3,112 ura3-52 his3-∆200 trp1-∆901 suc2-∆9 lys2-801 GAL+
yRS723	MAT alpha Kre2-HTF::NatMX GFP-Vps74::leu2::LEU2 erd1∆ leu2-3,112 ura3-52 his3-∆200 trp1-∆901 suc2-∆9 lys2-801 GAL+
yRS742	2n Erd1 (untagged)/Erd1-HTF::NatMX6 suc2-∆9/suc2-∆9 ura3-52/ura3-52 his3-∆200/his3-∆200 leu2-3,112/leu2-3,112 lys2-801/ lys2-801 trp1-∆901/trp1-∆901 GAL+
yRS743	2n Erd1-GFP::TRP1/Erd1-HTF::NatMX6 suc2-∆9/suc2-∆9 ura3-52/ura3-52 his3-∆200/his3-∆200 leu2-3,112/leu2-3,112 lys2-801/ lys2-801 trp1-∆901/trp1-∆901 GAL+
yRS727	MAT alpha Erd1-mNeonGreen-HA::TRP1 COP1-mCherry::KANMX ura3-52 his3-∆200 leu2-3,112 lys2-801 trp1-∆901
yRS754	MAT alpha leu2::mNeonGreen-VPS74::LEU2 COP1-mCherry::KANMX ura3-52 his3-∆200 leu2-3,112 lys2-801 trp1-∆901
yRS750	MAT alpha Och1-mNeonGreen-3xHA::TRP1 Mnn9-mCherry-HIS3 leu2-3,112 ura3-52 trp1-∆901 suc2-∆9 lys2-801 GAL+
yRS622	MAT alpha pmr1∆ leu2-3,112 ura3-52 his3-∆200 trp1-∆901 suc2-∆9 lys2-801 GAL+
yRS820	MAT alpha Erd1-mNeonGreen-3xHA::TRP1 mScarlet-Vps74::leu2::LEU2 vps74∆ leu2-3,112 ura3-52 his3-∆200 trp1-∆901 suc2-∆9 lys2-801 GAL+
yRS422	MAT alpha Mnn9-mCherry-HIS3 leu2-3,112 ura3-52 trp1-∆901 suc2-∆9 lys2-801 GAL+

## Sheet: Table S2- plasmids
Table S2: Plasmids used in this study
Plasmid	Description
pTK116	Vph1-mCherry LEU2 CEN
pRS858	GFP-Rer1 URA3 CEN
pRS909	GFP-Neo1 URA3 CEN
pRS802	Vps74 URA3 2micron
pRS828	Erd1 URA3 2micron
pRS824	Vps74 R6-8A URA3 2micron
pRS822	Vps74 ∆201-204 URA3 2micron
pRS919	Erd1-Cub-PLV LEU2 CEN
pRS934	NubG-HA-Vps74 TRP1 2micron
pRS905	Erd1-HA-NubG TRP1 2micron
pRS818	Gyp1 URA3 2micron
pRS863	Dcr2 URA3 2micron
pRS817	Cog5 URA3 2micron
pRS963	Cog7 URA3 2micron
pRS670	Ers1 URA3 2micron
pRS914	Neo1 URA3 2micron
pRS965	Ypt7 URA3 2micron
pRS976	Ypt1 URA3 2micron
pRS977	ypt1 Q67L URA3 2micron
pRS978	ypt1 S22N URA3 2micron
pRS1020	NG1-10-Vps74 URA3 CEN
pRS1021	NG11-Vps74 TRP1 CEN
pRS1061	Erd1-NG11 TRP1 CEN
pRS1059	Och1-NG1-10 URA3 CEN
pRS1057	NG11-Erd1 TRP1 CEN
